# Supplementary material for: Temperature sensitivity of nitrate removal in woodchip bioreactors increases with woodchip age and following drying–rewetting cycles
Source: Royal Society of Chemistry journal article supplement (doi:10.1039/d0ew00507j), 2020-01-01
Supplement: d0ew00507j1.pdf [file d0ew00507j1.pdf]

# **Supplemental Material: Temperature sensitivity of nitrate removal in woodchip bioreactors increases with woodchip age and following drying-rewetting cycles**

*Bryan M. Maxwell*<sup>1\*</sup>, *Carolina Díaz-García*<sup>1</sup>, *Juan José Martínez-Sánchez*<sup>1</sup>, *François Birgand*<sup>2</sup>,  
*José Álvarez-Rogel*<sup>1</sup>

<sup>1</sup>Universidad Politécnica de Cartagena, Cartagena, Murcia, Spain 30203

<sup>2</sup>North Carolina State University, Raleigh, North Carolina, USA 27695

Manuscript prepared for Environmental Science : Water Research and Technology

\*Corresponding author

Telephone : +1 704 819 0460 ; E-mail : ([bmmaxwel@gmail.com](mailto:bmmaxwel@gmail.com)); Mailing Address : 10 N Scarlet Elm Ct., Spring, Texas, 77382

**Keywords:** Woodchip bioreactor, carbon quality, denitrification, temperature sensitivity, drying-rewetting cycles

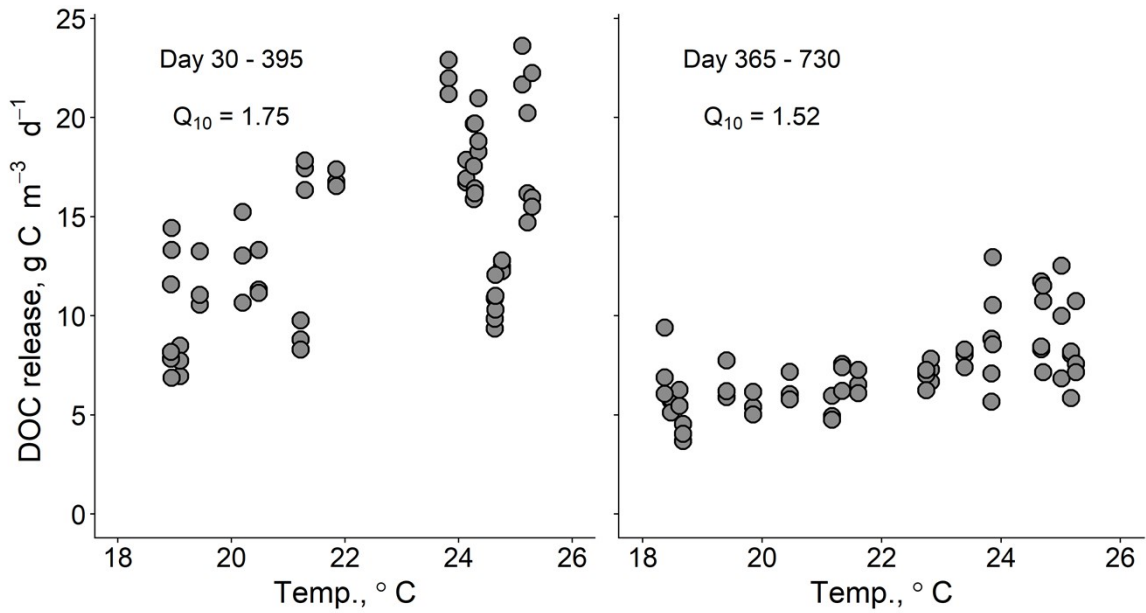

**Supplemental Figure 1.** Release of dissolved organic carbon (DOC) versus temperature in UPCT bioreactors for Days 30 – 395 (first year) and 365 – 730 (second year).  $Q_{10}$  of DOC release decreased with time, and values of  $Q_{10}$  were positive in both periods, showing that more DOC was released at higher temperatures.

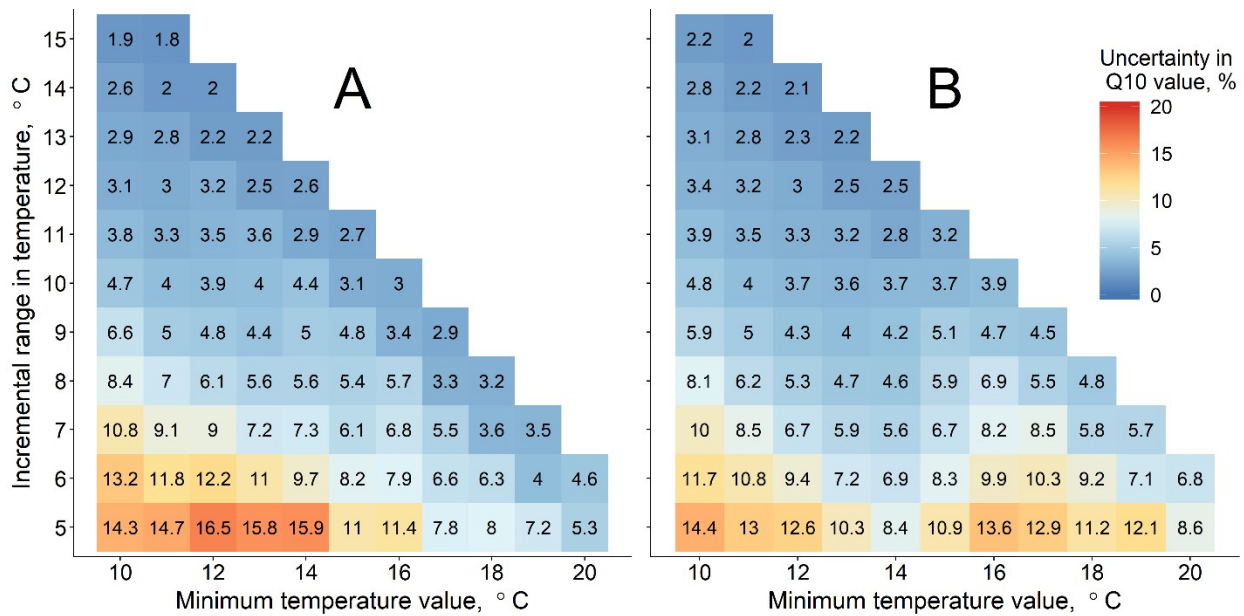

**Supplemental Figure 2.** Tile plots illustrating uncertainty of the calculated  $Q_{10}$  values for the UPCT field bioreactors during Days 30 – 395 (first year, A) and 365 – 730 (second year, B). Each tile represents a separate  $Q_{10}$  value when subsetting the data at various intervals according to minimum temperature (x-axis) and range in temperature of the interval (y-axis). Numbers shown within each tile are the uncertainty of the  $Q_{10}$  value at the given interval. Uncertainty generally decreased as range in temperature of the interval increased.

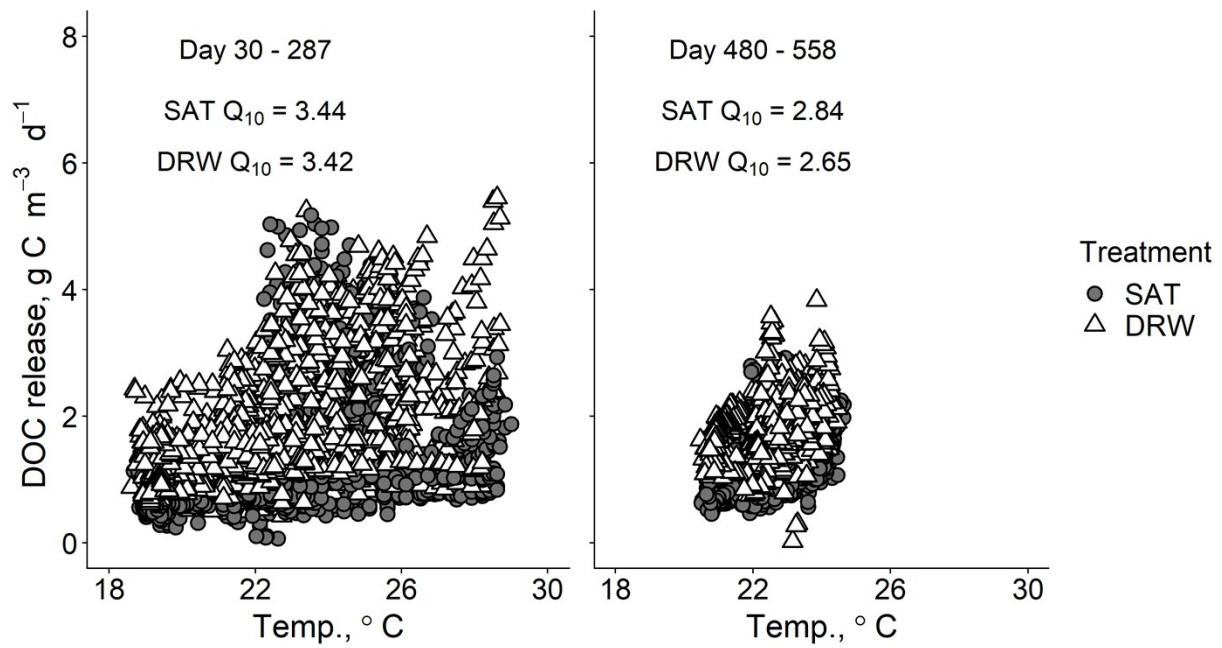

**Supplemental Figure 3.** Release of dissolved organic carbon (DOC) versus temperature in NCSU bioreactors for Days 30 – 287 and 480 – 558.  $Q_{10}$  of DOC release decreased with time, and values of  $Q_{10}$  were positive in both periods, showing that more DOC was released at higher temperatures.
